# Supplementary material
Source: publisher figshare collection journal article supplement (https://karger.figshare.com/articles/dataset/_/28581437)
Supplement: Supplementary file 1 [file 1]

**Supplementary Fig. 2. Receiver operating characteristic curve of the association between ETS and long-term response (PFS** ≥**8.0 months).**


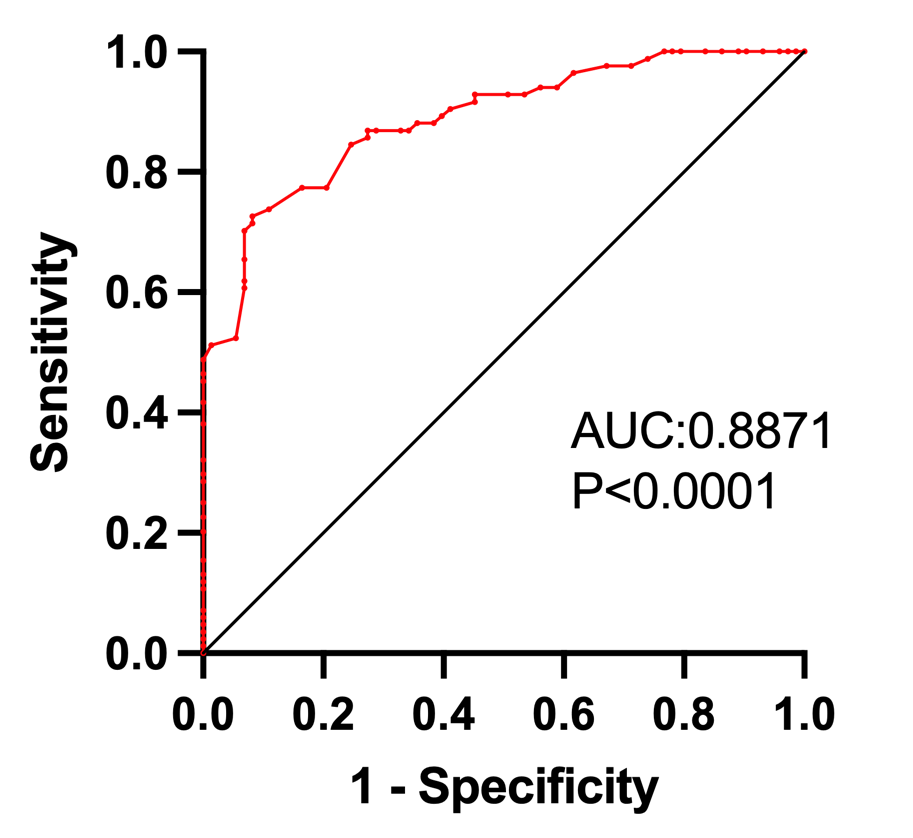


Abbreviations: ETS, early tumor shrinkage; PFS, progression-free survival
